# Supplementary material for: Rapid dissolution of β-chitin and hierarchical self-assembly of chitin chains in aqueous KOH/urea solution
Source: Royal Society of Chemistry journal article supplement (doi:10.1039/d1gc00514f), 2021-01-01
Supplement: d1gc00514f5.pdf [file d1gc00514f5.pdf]

## Supporting Information

### Rapid dissolution of $\beta$ -chitin and hierarchical self-assembly of chitin chains in aqueous KOH/urea solution

Junchao Huang,<sup>‡a</sup> Yi Zhong,<sup>‡a</sup> Pingdong Wei<sup>a</sup> and Jie Cai<sup>\*ab</sup>

<sup>a</sup> Hubei Engineering Centre of Natural Polymers-based Medical Materials, College of Chemistry and Molecular Sciences, Wuhan University, Wuhan 430072, China

<sup>b</sup> Research Institute of Shenzhen, Wuhan University, Shenzhen 518057, China

<sup>‡</sup> These authors contributed equally to this work.

<sup>\*</sup> Corresponding authors. [caijie@whu.edu.cn](mailto:caijie@whu.edu.cn) (J. Cai)

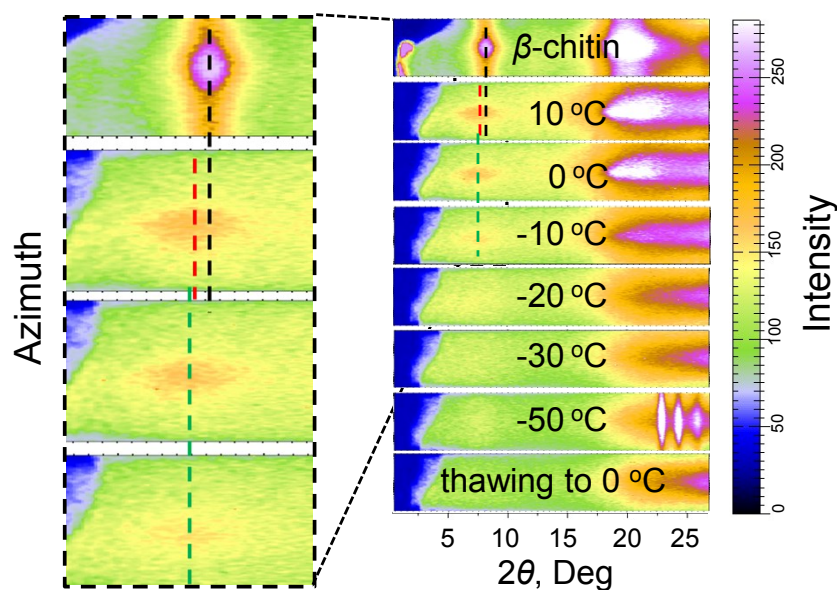

**Figure S1.** WAXD patterns of  $\beta$ -chitin and  $\beta$ -chitin dissolved in the aqueous KOH/urea solution at different temperatures. The diffraction patterns were transformed into polar coordinate for improved contrast.

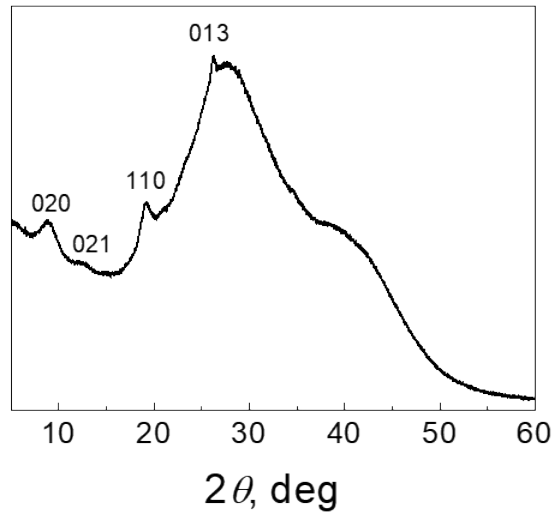

**Figure S2.** XRD pattern of wetted self-assembled chitin nanofibrils.

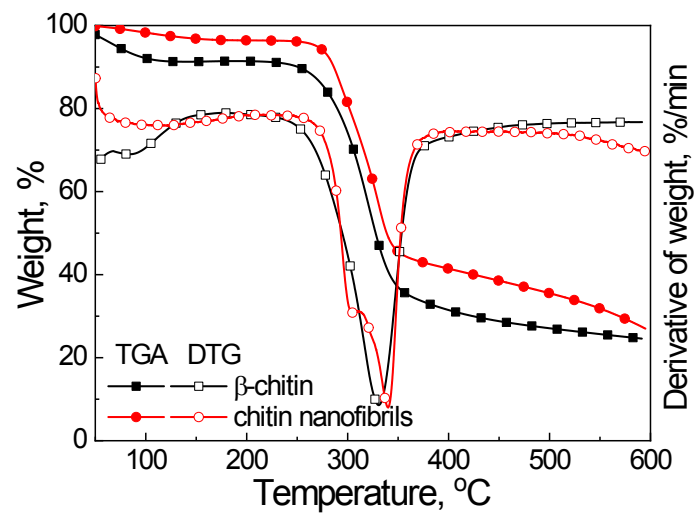

**Figure S3.** Thermogravimetry analysis (TGA) and derivative thermogravimetry (DTG) curves of  $\beta$ -chitin and self-assembled chitin nanofibrils under nitrogen atmosphere.

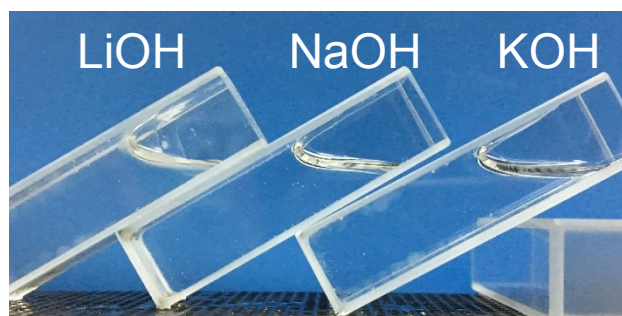

**Figure S4.** From left to right: Photographs of 2 wt.%  $\beta$ -chitin dissolved in aqueous LiOH/urea, NaOH/urea and KOH/urea solutions.

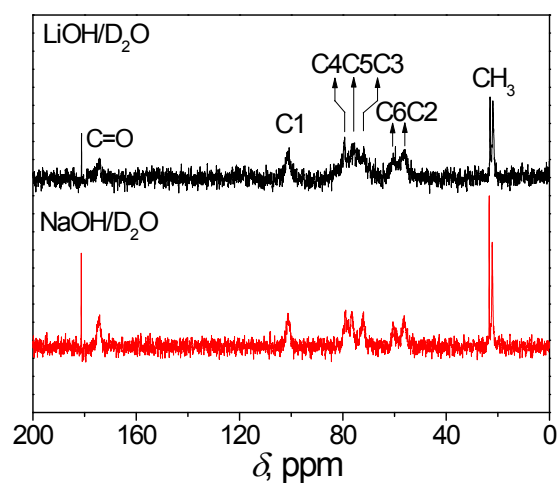

**Figure S5.** <sup>13</sup>C NMR spectra of β-chitin dissolved in aqueous LiOH/D<sub>2</sub>O and NaOH/D<sub>2</sub>O solutions.

**Table S1.**  $^{13}\text{C}$  NMR Chemical shifts of  $\beta$ -chitin solutions, dried  $\beta$ -chitin and self-assembled chitin nanofibrils.

| Sample                                    | Chemical shift, ppm |      |      |      |      |      |       |                 |
|-------------------------------------------|---------------------|------|------|------|------|------|-------|-----------------|
|                                           | C1                  | C2   | C3   | C4   | C5   | C6   | C=O   | CH <sub>3</sub> |
| $\beta$ -chitin/KOH/D <sub>2</sub> O      | 101.0               | 56.0 | 72.1 | 79.0 | 76.4 | 60.3 | 174.3 | 22.2            |
| $\beta$ -chitin/KOH/urea/D <sub>2</sub> O | 101.2               | 56.3 | 72.1 | 79.0 | 76.6 | 60.4 | 174.2 | 22.1, 23.3      |
| $\beta$ -chitin/LiOH/D <sub>2</sub> O     | 101.4               | 56.4 | 71.9 | 79.3 | 76.1 | 60.4 | 174.3 | 21.9, 23.0      |
| $\beta$ -chitin/NaOH/D <sub>2</sub> O     | 101.3               | 56.1 | 72.1 | 79.1 | 76.5 | 60.4 | 174.3 | 22.2, 23.3      |
| $\beta$ -chitin                           | 104.3               | 55.6 | 75.1 | 84.0 | 75.1 | 61.1 | 174.4 | 23.1            |
| Self-assembled chitin nanofibrils         | 104.3               | 55.3 | 73.6 | 83.1 | 75.7 | 61.1 | 173.7 | 22.9            |
